# Supplementary material for: Fullerene-based materials for solar cell applications: design of novel acceptors for efficient polymer solar cells – a DFT study
Source: Royal Society of Chemistry journal article supplement (doi:10.1039/c5cp02453f), 2015-01-01

## **Supplementary Information**

**Fullerene-based materials for solar cell applications: Design of novel acceptors for efficient polymer solar cells-a DFT study**

**Afshan Mohajeri\* and Akbar Omidvar**

**Department of Chemistry, College of Sciences, Shiraz University, Shiraz, Iran**

**\*Corresponding Author**

**E-mail: [amohajeri@shirazu.ac.ir](mailto:amohajeri@shirazu.ac.ir)**

**Phone: +98-7136137161. FAX: +98-7136460788.**

**Table S1.** Basis set performance for PC<sub>60</sub>BM

|                     | Basis set   | HOMO-LUMO<br>gap(eV) | $\eta$<br>(eV) | $\gamma$<br>(eV) | $\alpha$<br>$\text{\AA}^3$ | NICS <sup>Iso</sup><br>(ppm) | CPU time<br>(min) |
|---------------------|-------------|----------------------|----------------|------------------|----------------------------|------------------------------|-------------------|
| PC <sub>60</sub> BM | 6-31G(d)    | 2.19                 | 2.84           | -2.74            | 91                         | -1.5                         | 585               |
|                     | 6-31+G(d,p) | 2.14                 | 2.81           | -2.37            | 83                         | -1.4                         | 1710              |

**Figure S1.** Structures of fullerene derivatives and corresponding experimental open-circuit voltage of P3HT:fullerene devices from Ref. [6].

1) PC<sub>60</sub>BM ( $V_{OC}$ =600 mV)

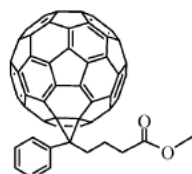

2) R=CH<sub>3</sub> ( $V_{OC}$  = 650 mV)

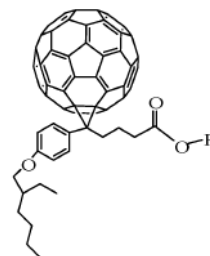

3) R=H ( $V_{OC}$  = 640 mV)

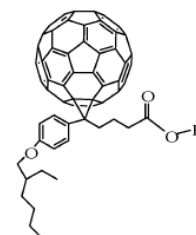

4) R<sub>1</sub>=CH<sub>3</sub>, R<sub>2</sub>=H ( $V_{OC}$  = 407 mV)

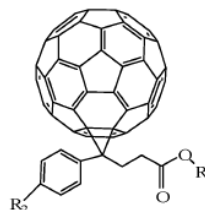

5)  $R_1=C_2H_5$ ,  $R_2=H$  ( $V_{OC} = 362$  mV)

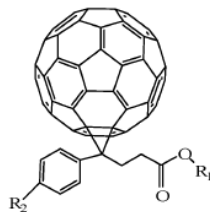

6)  $R_1= C_3H_9$ ,  $R_2=H$  ( $V_{OC} = 550$  mV)

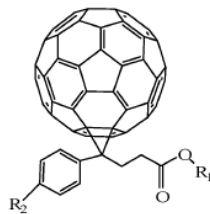

7)  $R_1=CH_3$ ,  $R_2=OCH_3$  ( $V_{OC} = 350$  mV)

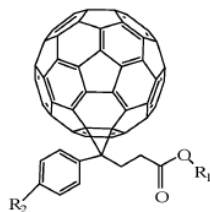

8) ( $V_{OC} = 580$  mV)

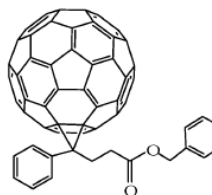

9) ( $V_{OC} = 640$  mV)

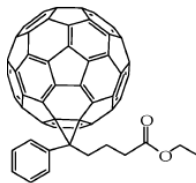

10 ( $V_{OC} = 600$  mV)

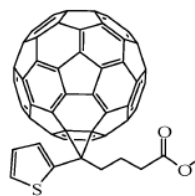

11 ( $V_{OC} = 600$  mV)

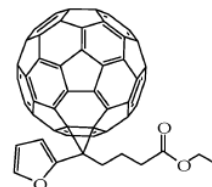

12) R=C<sub>2</sub>H<sub>5</sub> ( $V_{OC} = 600$  mV)

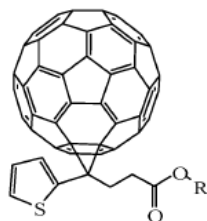

13) R=C<sub>3</sub>H<sub>9</sub> ( $V_{OC} = 600$  mV)

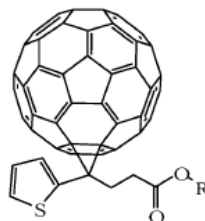

14) R=C<sub>4</sub>H<sub>9</sub> ( $V_{OC} = 600$  mV)

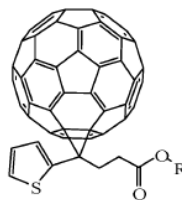

**15** ( $V_{OC} = 564$  mV)

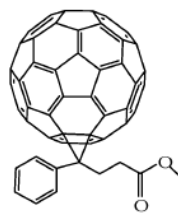

**16** ( $V_{OC} = 535$ )

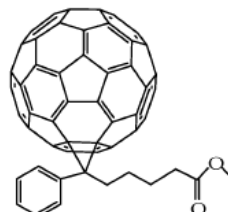

**17** ( $V_{OC} = 596$  mV)

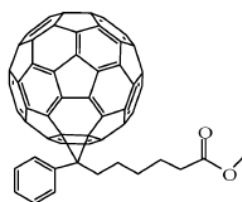

**18** ( $V_{OC} = 540$  mV)

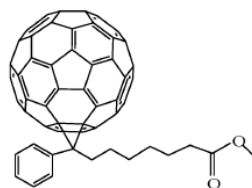

**19** ( $V_{OC} = 650$  mV)

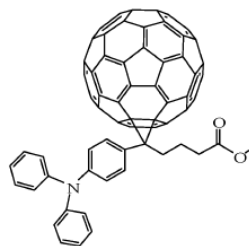

**20** ( $V_{OC} = 650$  mV)

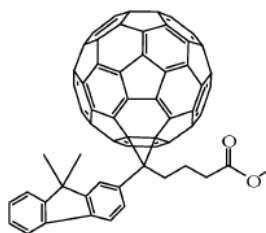

**21** ( $V_{OC} = 580$  mV)

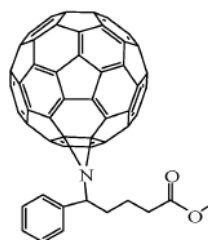

**22** ( $V_{OC} = 530$  mV)

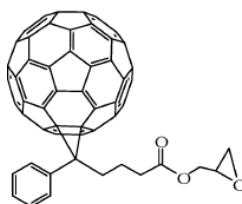

**23** ( $V_{OC} = 730$  mV)

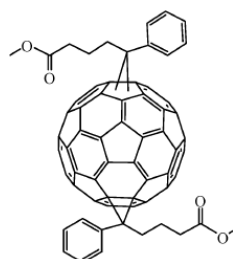

**24** ( $V_{OC} = 810$  mV)

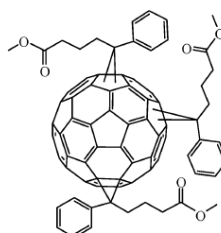

25 ( $V_{OC} = 720$  mV)

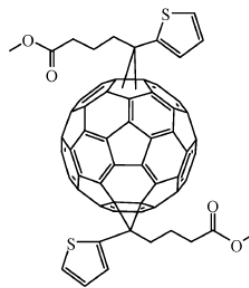

Supplement: c5cp02453f1.pdf [file c5cp02453f1.pdf]
